# Supplementary material
Source: PubMed Central journal article supplement (PMC3482164)
Supplement: NIHMS409684-supplement-4.pdf [file NIHMS409684-supplement-4.pdf]

## SUPPLEMENTAL MATERIAL

### Detailed Methods

#### Primary antibodies used in flow cytometry

Monoclonal anti-human brachyury –APC (R&D Systems); mouse monoclonal cTnT (IgG1, Thermo Scientific, 1:200 dilution); mouse monoclonal smooth muscle actin (IgG2a, Thermo Scientific, 1:100 dilution); mouse monoclonal MLC2a (IgG2b, Synaptic Systems, Germany, 1:400 dilution); rabbit polyclonal MLC2v (IgG, ProteinTech Group, 1:200 dilution); mouse monoclonal antibody for sarcomeric myosin, MF20 (IgG2b, Developmental Studies Hybridoma Bank, Iowa City, IA, 1:20 dilution); mouse anti-human Ki-67 (IgG1, BD Biosciences, 1:100 dilution); FITC mouse anti-human CD31 (BD Biosciences Cat. No. 555445); anti-myosin, smooth muscle (rabbit IgG, Biomedical Technologies, Inc., 1:500 dilution); mouse anti-human fibroblasts (clone TE-7) (IgG1, Chemicon, 1:100 dilution).

#### Primary antibodies used in immunolabeling

Mouse monoclonal Oct3/4 (IgG<sub>2b</sub>, Santa Cruz, 1:100 dilution); rabbit polyclonal Nanog (IgG, Cosmo Bio Co Ltd, 1:100 dilution); mouse monoclonal SSEA4 (IgG<sub>3</sub>, Abcam 1:200 dilution); goat polyclonal anti-human E-cadherin (IgG, R&D, 1:100 dilution); rabbit polyclonal N-cadherin (IgG, Santa Cruz, 1:100 dilution); rabbit polyclonal laminin (IgG, Sigma, 1:500 dilution); goat polyclonal brachyury (IgG, R&D, 1:50 dilution); mouse monoclonal cTnT (IgG<sub>1</sub>, Thermo Scientific, 1:200 dilution); mouse monoclonal  $\alpha$ -actinin (IgG<sub>1</sub>, Sigma, 1:500 dilution); mouse monoclonal smooth muscle actin (IgG<sub>2a</sub>, Thermo Scientific, 1:100 dilution); mouse monoclonal MLC2a (IgG<sub>2b</sub>, Synaptic Systems, Germany, 1:400 dilution); rabbit polyclonal MLC2v (IgG, ProteinTech Group, 1:200 dilution).

### Supplemental Figures

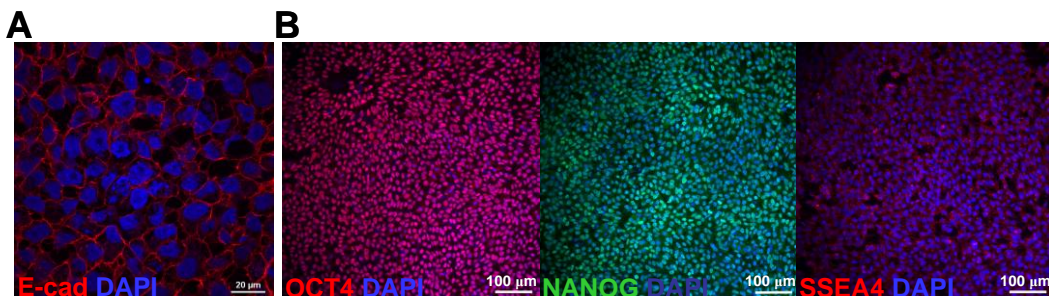

**Online Figure I. Monolayer cultured human PSCs exhibit epithelial phenotype and express pluripotency markers.** (A) Immunolabeling of monolayer cells (DF19-9-11T) cultured in mTeSR1 medium showing the adhesion junction protein E-cadherin present on the lateral surfaces of the cells. Scale bar is 20 µm. (B) Immunolabeling of monolayer cells (DF19-9-11T) for OCT4, NANOG and SSEA4 showing robust expression of these pluripotency markers. Scale bars are 100 µm.

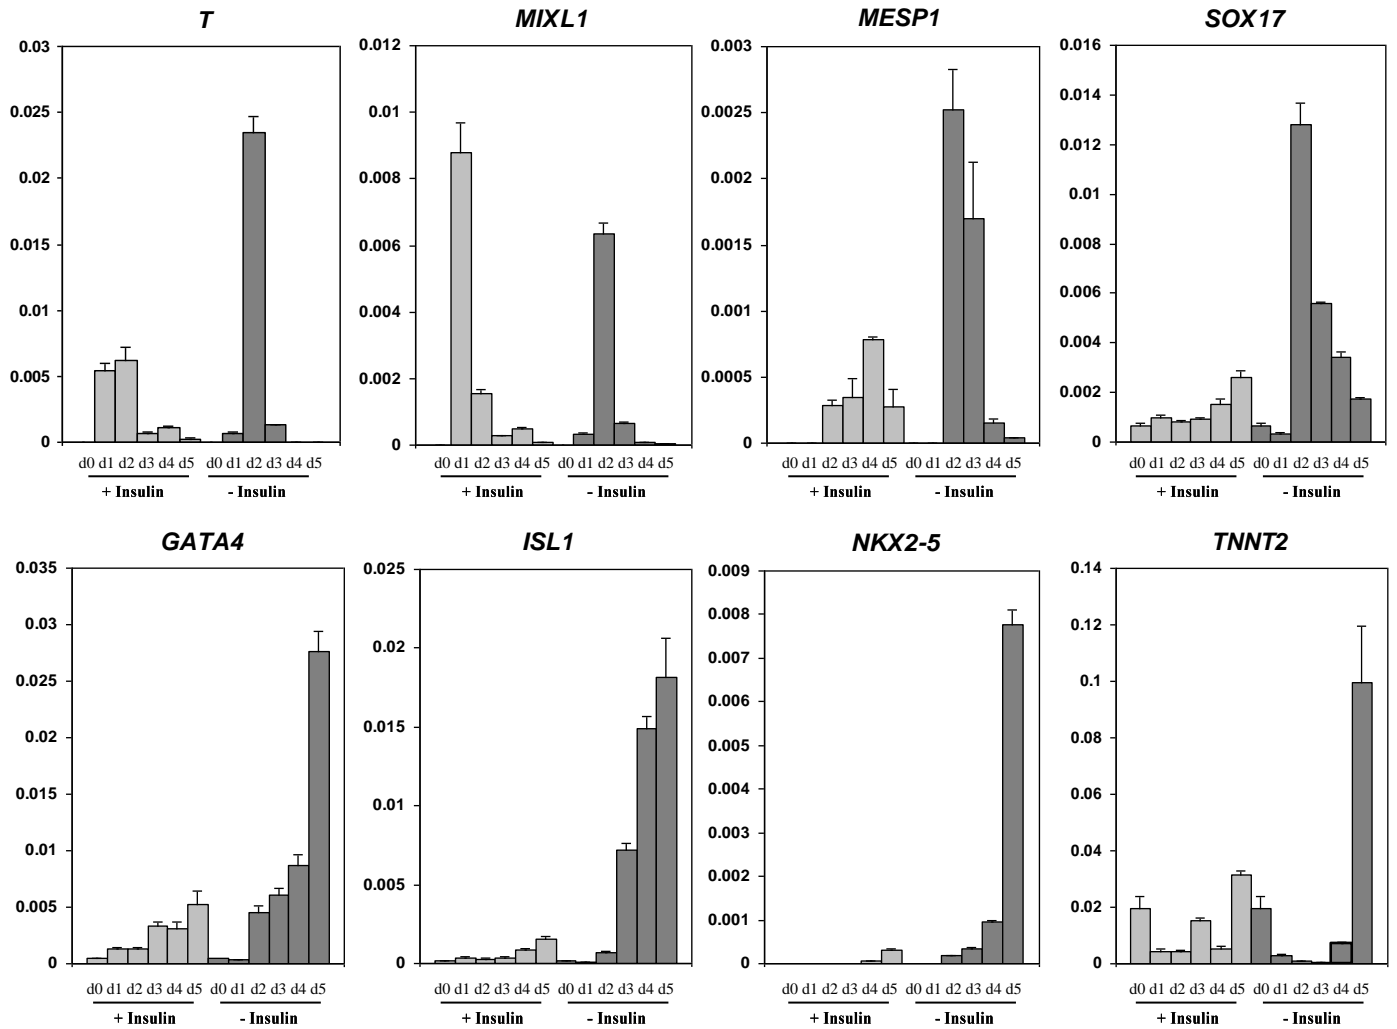

**Online Figure II. Insulin inhibits cardiogenesis of human PSCs during stage 2 of the matrix sandwich protocol.** Total RNA was isolated from cells at days 0-5 of the matrix sandwich protocol in the RPMI medium supplemented B27 with or without insulin. Quantitative RT-PCR for early mesoderm markers and cardiac transcription factors was performed. The relative gene expression was normalized to the endogenous control  $\beta$ -actin. Samples without insulin generally showed a greater expression of cardiac genes. Error bars represent SEM.

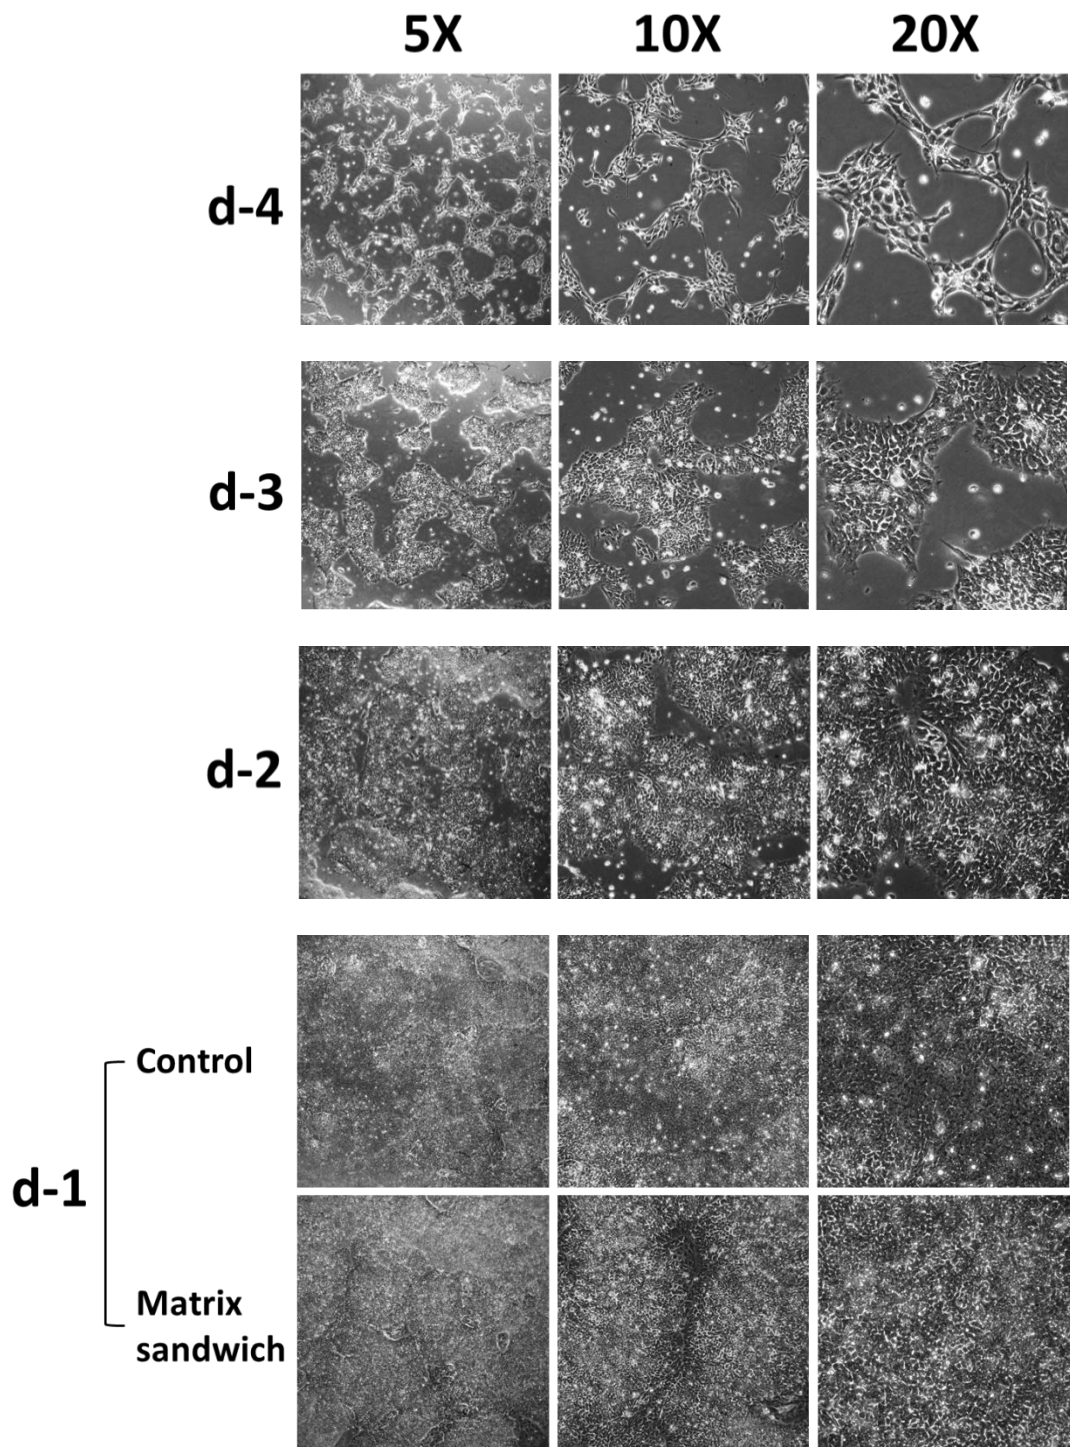

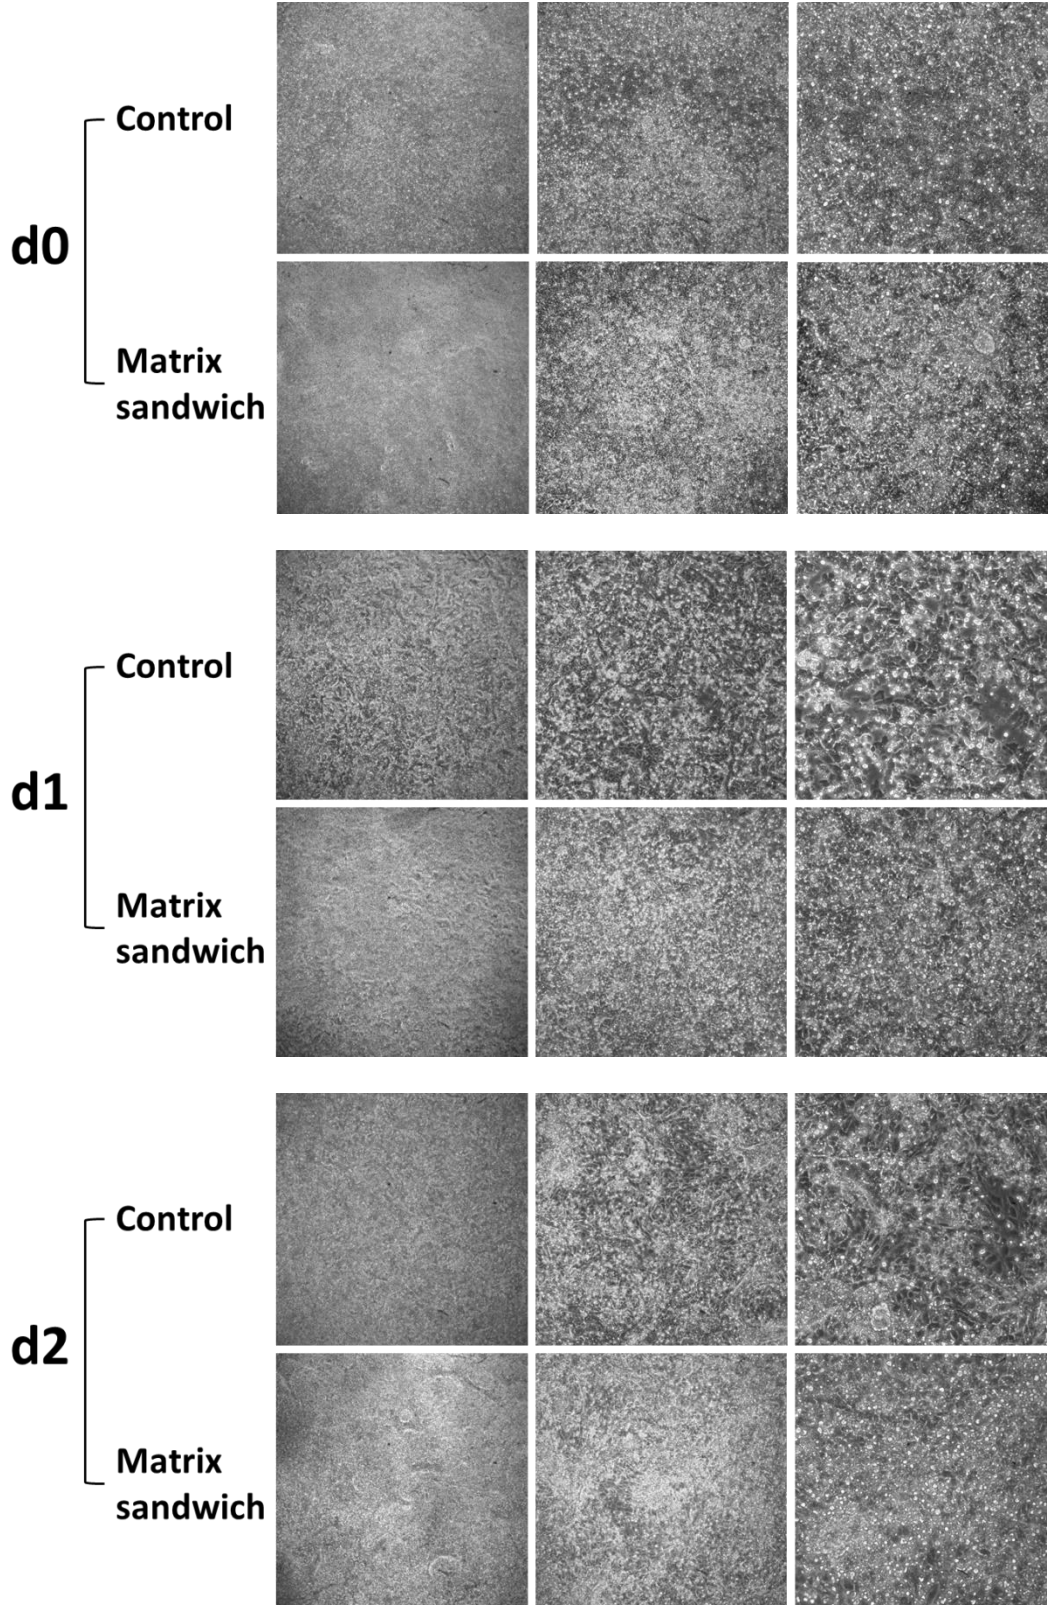

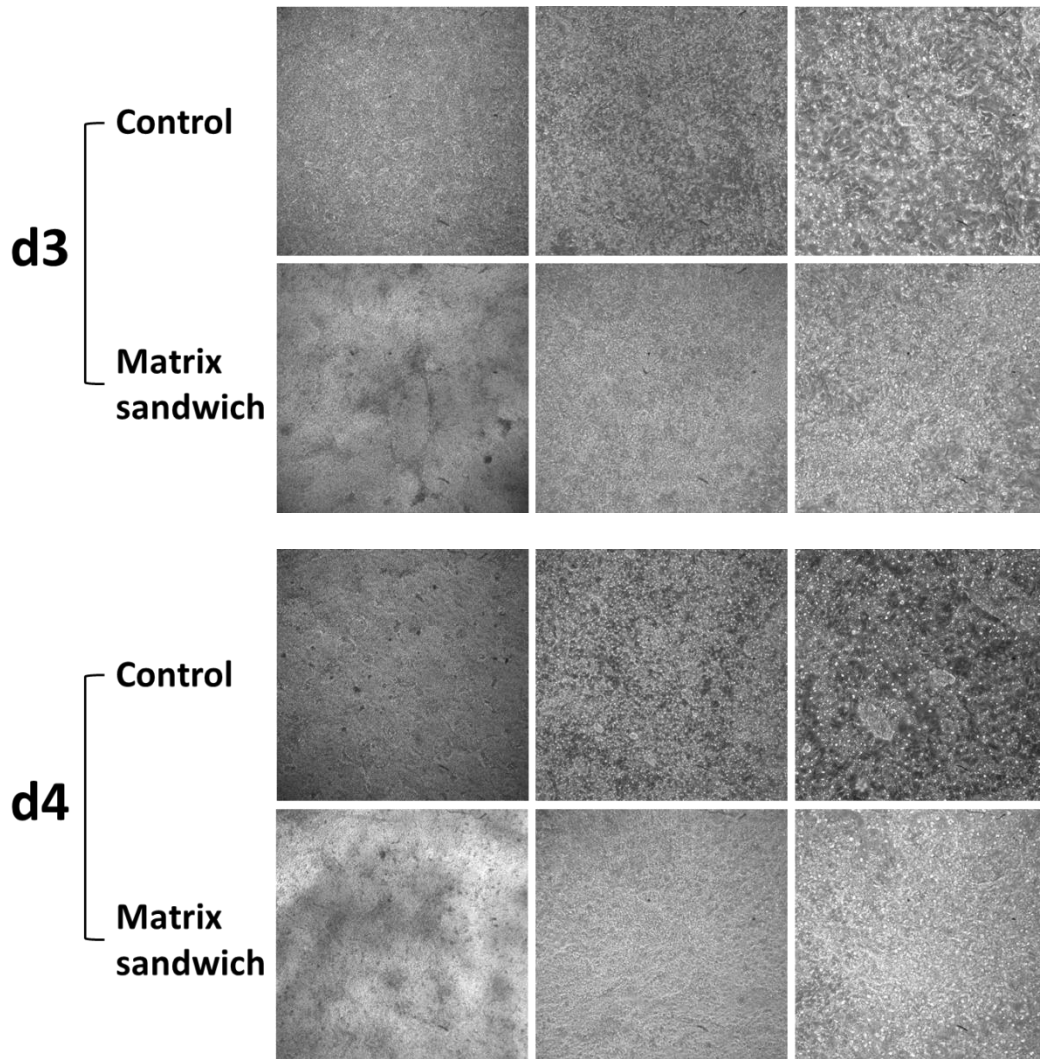

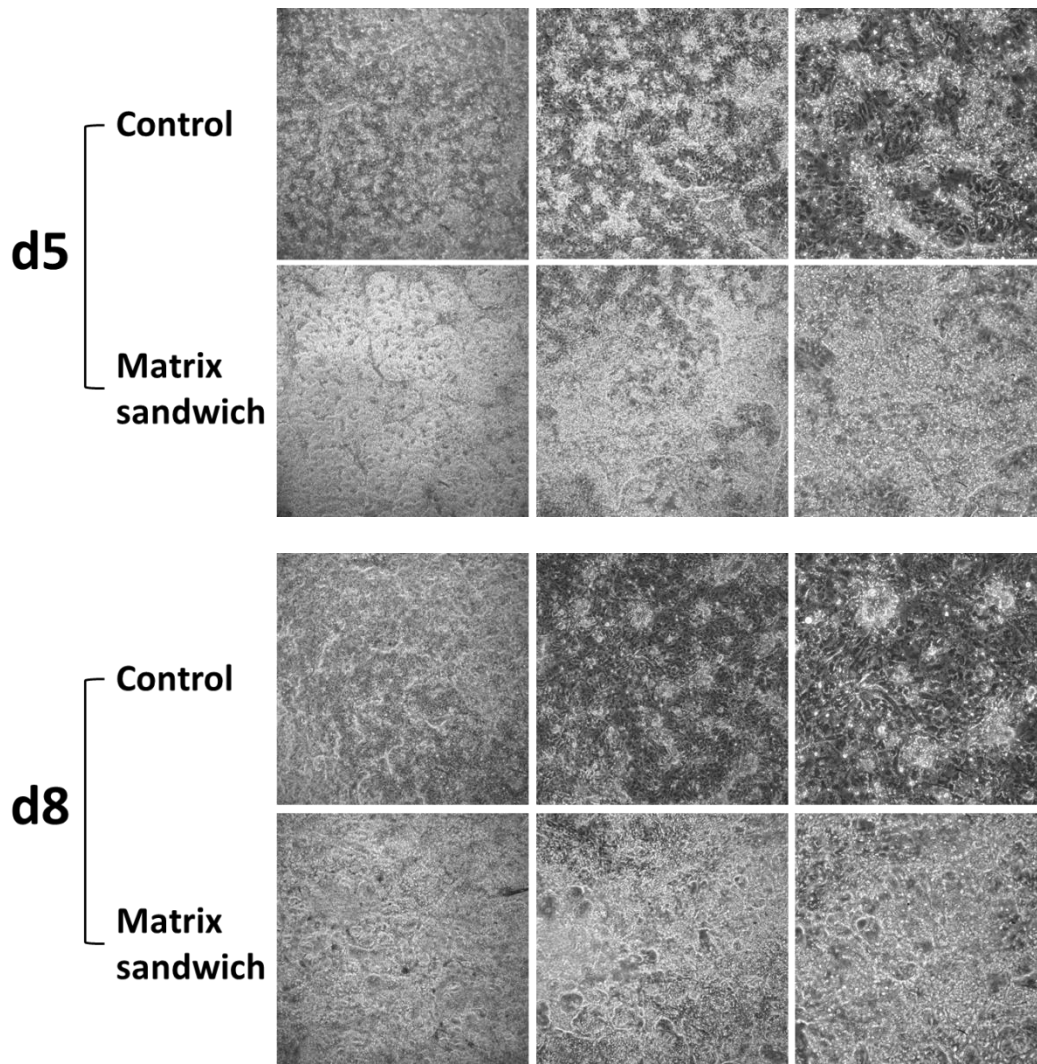

**Online Figure III. Phase contrast images showing iPSCs DF19-9-11T from day -4 to day 8 of differentiation for both control (without Matrigel overlays) and matrix sandwich culture using the protocol as shown in Figure 3A. Images were taken under 5X, 10X and 20X objectives every 24 hours after single cell seeding on Matrigel coated 6-well plate, d0 images show the cells before adding Activin A.**



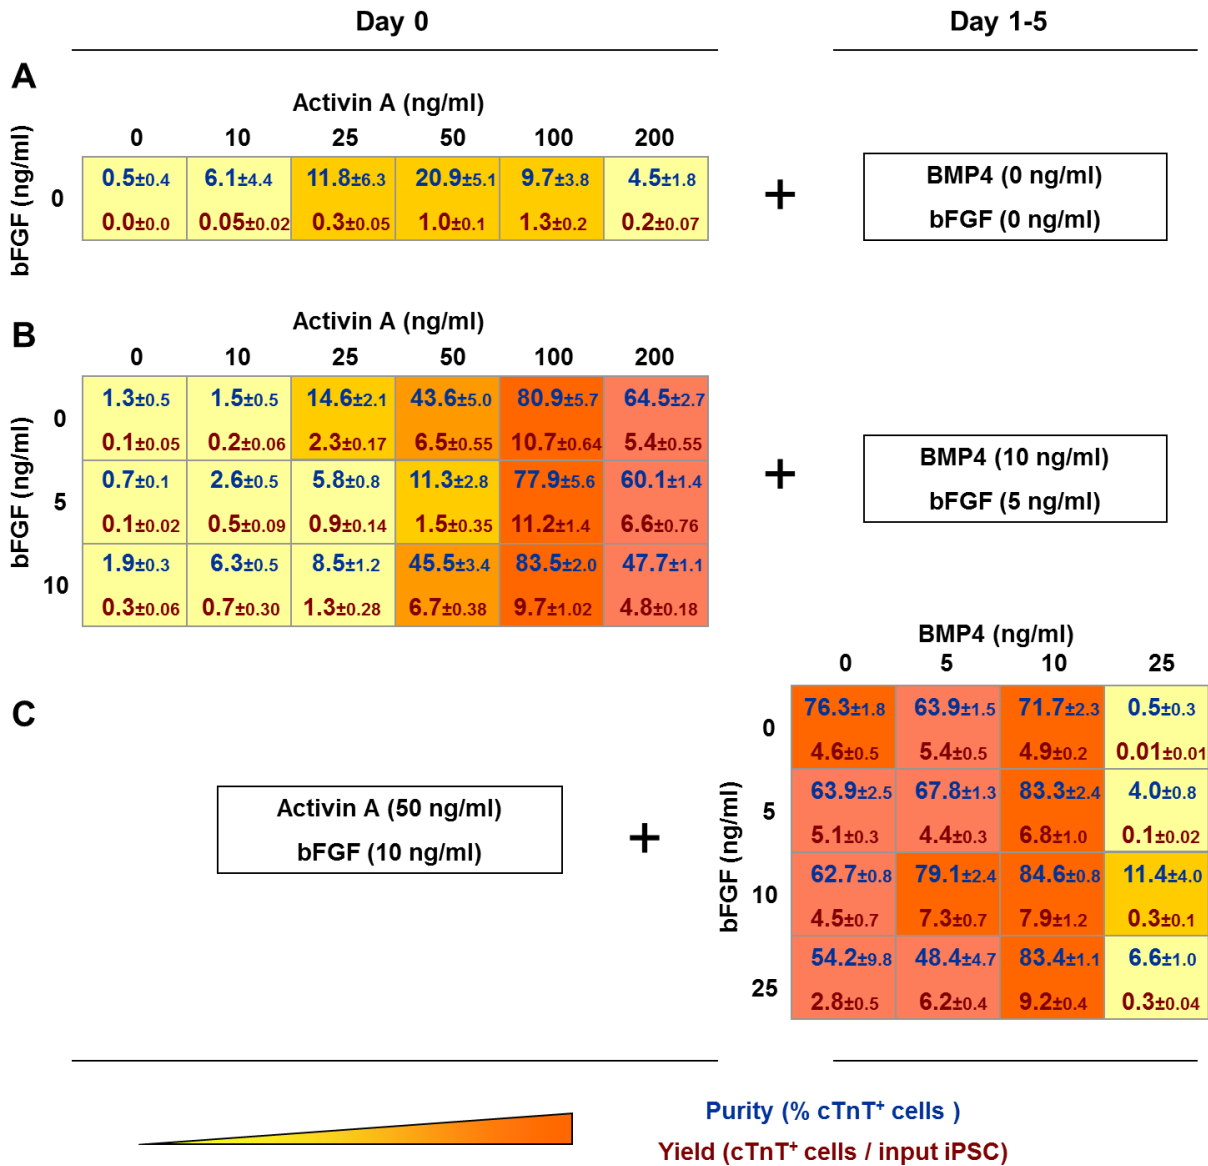

**Online Figure IV. Concentration-dependent effects of Activin A, BMP4 and bFGF on cardiogenesis of human PSCs using the matrix sandwich protocol.** Cardiogenesis was measured by flow cytometry of cTnT<sup>+</sup> CMs at 15 days differentiation. The purity and the yield of cTnT<sup>+</sup> CMs are displayed in the tables as mean ± SEM and associated with the heat map. (A) The effect of single growth factor, Activin A, added at day 0 of the matrix sandwich protocol. (B) The effect of different concentrations of Activin A and bFGF added on day 0, followed by BMP4 (10 ng/ml) and bFGF (5 ng/ml) at day 1 of the matrix sandwich protocol. (C) The effect of different concentrations of BMP4 and bFGF added at day 1 following 24 hour treatment with Activin A (50 ng/ml) and bFGF (10 ng/ml).

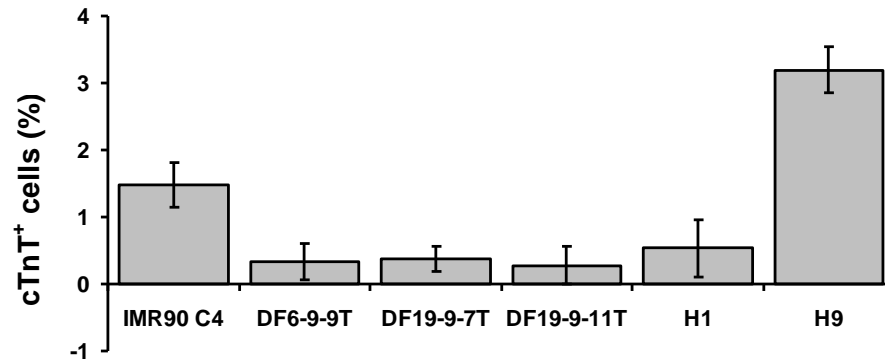

**Online Figure V. Low efficiency and variable cardiac differentiation of hPSC lines using serum-based EB method.** Efficiency of cardiac differentiation was measured by flow cytometry for cTnT<sup>+</sup> CMs in EB culture at 30 days of differentiation. Error bars represent SD. One-way ANOVA with Tukey test showed that the percentages of cTnT<sup>+</sup> cells from H9 and IMR90 C4 were significantly different from the other cell lines,  $P < 0.05$ .

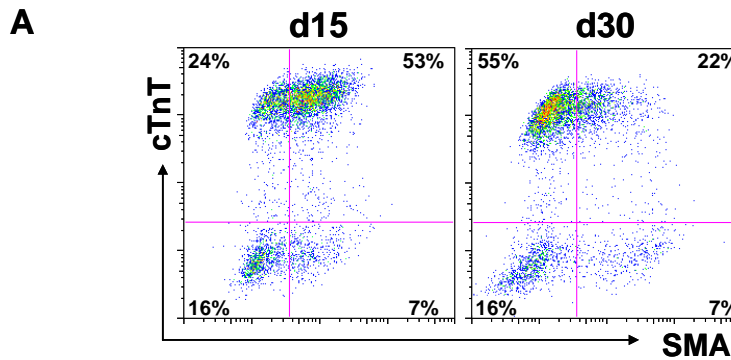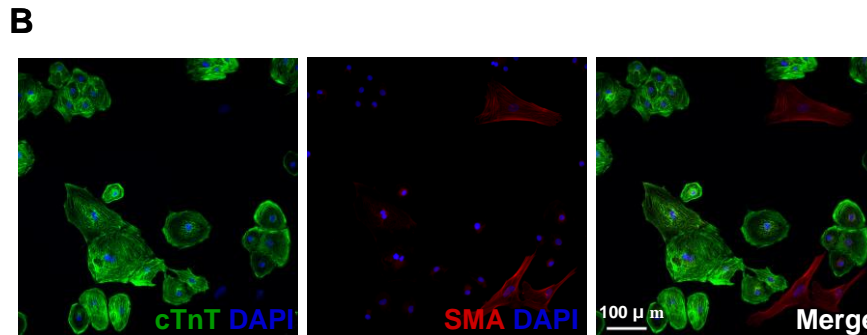

**Online Figure VI. Expression of smooth muscle actin (SMA) in early and late differentiated CMs using the matrix sandwich protocol.** (A) Flow cytometry analysis comparing matrix sandwich differentiated cells (DF19-9-11T) after 15 and 30 days for expression of cTnT and SMA. (B) Immunofluorescence images of re-plated cells differentiated from the iPSCs (DF19-9-11T) for 30 days using the matrix sandwich protocol and labeled with antibodies to the cTnT and SMA. Scale bar is 100  $\mu\text{m}$ .



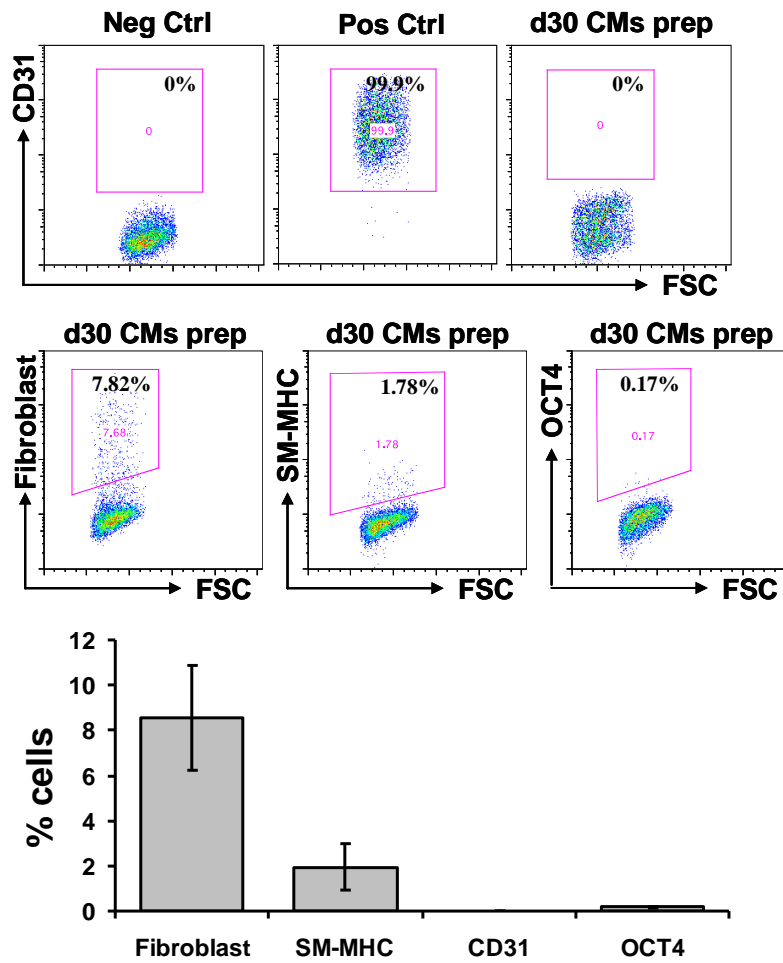

**Online Figure VII. Characterization of non-CMs in the matrix sandwich culture differentiated from human PSCs.** Human ESCs and iPSCs were differentiated for 30 days using the matrix sandwich protocol and labeled with fibroblast (clone TE-7), smooth muscle myosin heavy chain (SM-MHC), CD31 and Oct4 antibodies for flow cytometry. CD31 labeling was performed with live cell labeling, negative control was secondary antibody only, and positive control was the endothelial cells differentiated from hESCs. The average data from iPSCs DF19-9-11T for fibroblast, SM-MHC, Oct4 and CD31 positive cells were plotted in the bar graph. Error bars represent SEM.

## Supplemental Tables

**Online Table I. Primers for RT-PCR and quantitative RT-PCR**

### Primers for RT-PCR

| <b>Genes</b>  | <b>Sequences (5' - 3')</b>                                                 | <b>Size (bp)</b> |
|---------------|----------------------------------------------------------------------------|------------------|
| <i>OCT4</i>   | <b>F:</b> CAGTGCCCGAAACCCACAC<br><b>R:</b> GGAGACCCAGCAGCCTCAAA            | 161              |
| <i>NANOG</i>  | <b>F:</b> CAGAAGGCCTCAGCACCTAC<br><b>R:</b> ATTGTTCCAGGTCTGGTTGC           | 111              |
| <i>NKX2-5</i> | <b>F:</b> GCGATTATGCAGCGTGCAATGAGT<br><b>R:</b> AACATAAATACGGGTGGGTGCGTG   | 220              |
| <i>TNNT2</i>  | <b>F:</b> TTCACCAAAGATCTGCTCCTCGCT<br><b>R:</b> TTATTACTGGTGTGGAGTGGGTGTGG | 165              |
| <i>MYH6</i>   | <b>F:</b> GGGGACAGTGGTAAAAGCAA<br><b>R:</b> TCCCTGCGTTCCACTATCTT           | 542              |
| <i>ACTN2</i>  | <b>F:</b> GCGGTGCAGTACAACCTACGTG<br><b>R:</b> AGTCAATGAGGTCAGGCCGGT        | 580              |
| <i>MYL7</i>   | <b>F:</b> GAGGAGAATGGCCAGCAGGAA<br><b>R:</b> GCGAACATCTGCTCCACCTCA         | 449              |
| <i>MYL2</i>   | <b>F:</b> ACATCATCACCCACGGAGAAGAGA<br><b>R:</b> ATTGGAACATGGCCTCTGGATGGA   | 164              |
| <i>HPPA</i>   | <b>F:</b> GAACCAGAGGGGAGAGACAGAG<br><b>R:</b> CCCTCAGCTTGCTTTTTAGGAG       | 406              |
| <i>PLN</i>    | <b>F:</b> ACAGCTGCCAAGGCTACCTA<br><b>R:</b> GCTTTTGACGTGCTTGTTGA           | 191              |
| <i>ACTB</i>   | <b>F:</b> CCTGAACCCTAAGGCCAACCG<br><b>R:</b> GCTCATAGCTCTTCTCCAGGG         | 400              |
| <i>SOX1</i>   | <b>F:</b> CAATGCGGGGAGGAGAAGTC<br><b>R:</b> CTCTGGACCAAACCTGTGGCG          | 464              |
| <i>PAX6</i>   | <b>F:</b> GGCAGGTATTACGAGACTGG<br><b>R:</b> CCTCATCTGAATCTTCTCCG           | 427              |

|              |                                                                  |     |
|--------------|------------------------------------------------------------------|-----|
| <i>SOX17</i> | <b>F:</b> CGCACGGAATTTGAACAGTA<br><b>R:</b> GGATCAGGGACCTGTCACAC | 180 |
| <i>FOXA2</i> | <b>F:</b> GGGAGCGGTGAAGATGGA<br><b>R:</b> TCATGTTGCTCACGGAGGAGTA | 326 |
| <i>T</i>     | <b>F:</b> CTTCCCTGAGACCCAGTTCA<br><b>R:</b> CAGGGTTGGGTACCTGTCAC | 289 |
| <i>MESP1</i> | <b>F:</b> CGCTATATCGGCCACCTGTC<br><b>R:</b> GGCATCCAGGTCTCCAACAG | 378 |
| <i>GATA4</i> | <b>F:</b> TCCAAACCAGAAAACGGAAG<br><b>R:</b> AAGACCAGGCTGTTCCAAGA | 352 |
| <i>ISL1</i>  | <b>F:</b> CACAAGCGTCTCGGGATT<br><b>R:</b> AGTGGCAAGTCTTCCGACA    | 202 |
| <i>TNNI3</i> | <b>F:</b> CTGCAGATTGCAAAGCAAGA<br><b>R:</b> CCTCCTTCTTCACCTGCTTG | 379 |

#### Primers for quantitative RT-PCR

| <b>Genes</b>  | <b>TaqMan® Gene Expression Assay ID</b> | <b>Size (bp)</b> |
|---------------|-----------------------------------------|------------------|
| <i>ACTB</i>   | Hs99999903_m1                           | 171              |
| <i>CDH1</i>   | Hs01023894_m1                           | 61               |
| <i>CDH2</i>   | Hs00983056_m1                           | 66               |
| <i>SNAIL1</i> | Hs00195591_m1                           | 66               |
| <i>SNAIL2</i> | Hs00950344_m1                           | 86               |
| <i>GSC</i>    | Hs00418279_m1                           | 81               |
| <i>VIM</i>    | Hs00185584_m1                           | 73               |
| <i>FNI</i>    | Hs01549976_m1                           | 81               |
| <i>T</i>      | Hs00610080_m1                           | 132              |
| <i>MIXL1</i>  | Hs00430824_g1                           | 152              |
| <i>MESP1</i>  | Hs00251489_m1                           | 80               |

|               |               |     |
|---------------|---------------|-----|
| <i>SOX17</i>  | Hs00751752_s1 | 149 |
| <i>GATA4</i>  | Hs00171403_m1 | 68  |
| <i>ISL1</i>   | Hs00158126_m1 | 57  |
| <i>NKX2-5</i> | Hs00231763_m1 | 64  |
| <i>TNNT2</i>  | Hs00165960_m1 | 89  |

### Legends for Video Files

**Online Movie 1 and 2. Contracting sheet of CMs differentiated from the transgene-free iPSCs (DF19-9-11T) using the matrix sandwich protocol.** Movies were taken at 15 days differentiation. Movie S1 was taken with 20X magnification, and Movie S2 was with 100X magnification.

**Online Movie 3. Optical mapping demonstrating reentry in human PSC-derived CM monolayers.** Phase movies showing electrical reentry in ESC-H9 (*left*) and iPSC-DF19-9-11T (*right*) CM monolayers. Green represents the depolarization phase of the propagating action potential, phase zero; red represents phase 2 or the plateau phase of the action potential; finally orange and yellow represent phase 3 repolarization of the action potential.
